# MODELLING OF THE CARDIOPULMONARY RESPONSES TO MAXIMAL AEROBIC EXERCISE IN PATIENTS WITH CYSTIC FIBROSIS

1 Craig A. Williams<sup>1\*</sup>, Kyle C. A. Wedgwood<sup>2,3</sup>, Hossein Mohammadi<sup>2,4</sup>, Owen W. Tomlinson<sup>1</sup>,  
2 Krasimira Tsaneva-Atanasova<sup>2,3</sup>

3

4 <sup>1</sup>Children's Health and Exercise Research Centre, Sport and Health Sciences, University of Exeter,  
5 Exeter, UK

6 <sup>2</sup>Department of Mathematics and Living Systems Institute, University of Exeter, Exeter, UK

7 <sup>3</sup>Centre for Biomedical Modelling and Analysis, University of Exeter, Exeter, EX4 4QJ

8 <sup>4</sup>EPSRC Centre for Predictive Modelling in Healthcare, University of Exeter, Exeter, EX4 4QJ, UK

9

## 10 \* **Corresponding Author:**

11 Professor Craig A. Williams

12 Children's Health and Exercise Research Centre

13 Sport and Health Sciences

14 College of Life and Environmental Sciences

15 University of Exeter

16 St Luke's Campus

17 Exeter, EX1 2LU

18 UNITED KINGDOM

19 Tel: 44 (0)1392 724890

20 Email: [c.a.williams@exeter.ac.uk](mailto:c.a.williams@exeter.ac.uk)

21

22 **Keywords:** modelling, Gaussian process, ventilation, gas exchange, physiology

23

24

25

26

27

28 **ABSTRACT**

29 Cystic fibrosis (CF) is a debilitating chronic condition, which requires complex and expensive  
30 disease management. Exercise has now been recognised as a critical factor in improving health and  
31 quality of life in patients with CF. Hence, cardiopulmonary exercise testing (CPET) is used to  
32 determine aerobic fitness of young patients as part of the clinical management of CF. However, at  
33 present there is a lack of conclusive evidence for one limiting system of aerobic fitness for CF  
34 patients at individual patient level.

35  
36 Here, we perform detailed data analysis that allows us to identify important systems-level factors that  
37 affect aerobic fitness. We use patients' data and principal component analysis to confirm the  
38 dependence of CPET performance on variables associated with ventilation and metabolic rates of  
39 oxygen consumption. We find that the time at which participants cross the anaerobic threshold (AT)  
40 is well correlated with their overall performance. Furthermore, we propose a predictive modelling  
41 framework that captures the relationship between ventilatory dynamics, lung capacity and function  
42 and performance in CPET within a group of children and adolescents with CF. Specifically, we show  
43 that using Gaussian processes (GP) we can predict AT at the individual patient level with reasonable  
44 accuracy given the small sample size of the available group of patients. We conclude by presenting  
45 future perspectives for improving and extending the proposed framework.

46  
47 Our modelling and analysis have the potential to pave the way to designing personalised exercise  
48 programmes that are tailored to specific individual needs relative to patient's treatment therapies.

49  
50  
51  
52  
53  
54  
55  
56  
57  
58  
59  
60

61

## 62 INTRODUCTION

63 Cystic fibrosis (CF) is the most common life shortening genetic disease in the Caucasian population,  
64 affecting nearly 11,000 individuals in the United Kingdom (UK) (1). The pathology of the disease,  
65 for which there is no cure, manifests itself throughout the respiratory, digestive and reproductive  
66 systems of the human body. Currently, as there is no cure for CF, the management of the disease is a  
67 key factor in the quality of care and health related quality of life factors. Part of the management of  
68 this disease requires cardiopulmonary exercise testing (CPET) to determine aerobic fitness, as  
69 represented by the maximal oxygen consumption ( $\dot{V}O_{2max}$ ). This parameter provides a clinically  
70 useful prognostic evaluation of a patient's functional capabilities. Even in mild to moderate severity  
71 of CF, patients are known to demonstrate impairments in cardiac and respiratory functions leading to  
72 exercise intolerance.

73

74 Enhanced aerobic fitness has been shown to improve quality of life in young patients with CF (6-18  
75 years), with benefits including lower risk of hospitalisation, increased exercise tolerance, reduced  
76 residual volume, increased endurance of the respiratory muscles, enhanced sputum expectoration and  
77 decreased rate of decline in pulmonary function (2-6). It has also been shown from CPET that  
78 individuals with CF possessing a higher  $\dot{V}O_{2max}$  are shown to have a reduced mortality risk. Nixon *et*  
79 *al.* (1992) reported that individuals with a  $\dot{V}O_{2max}$  greater than 82% of their predicted value had an  
80 83% 8-year survival rate, compared to just 28% 8-year survival rate for patients with a  $\dot{V}O_{2max}$  less  
81 than 58% of their predicted value (7). Furthermore, patients with a higher  $\dot{V}O_{2max}$  also have  
82 additional benefits in terms of improved fluid balance, retention of serum electrolytes through  
83 increased plasma volume, and potential for impact on sweat gland function thus reducing thermal  
84 strain and dehydration (8). These systemic changes are advantageous responses to exercise training,  
85 and result in an enhanced quality of life, increased physical function and increased life expectancy (9,  
86 10).

87

88 Effective management of the disease has become even more critical in recent years due to an aging  
89 CF population group, with the median predicted survival of children born with CF in the UK now  
90 being 45 years (1). As a consequence of an aging patient group and high medical care costs (11),  
91 maintaining or enhancing fitness is crucial. Exercise has being widely acknowledged as a key  
92 management strategy for CF, supported by some mechanistic data on the systemic effects of exercise  
93 at the cellular level *in vivo* in young patients with CF (5-9). However, an integrated systems level

94 understanding of the limitations of aerobic fitness for CF patients is lacking. Measurement techniques  
95 that do exist to quantify within-organ, real-time perfusion and intracellular oxygenation are invasive  
96 and unethical for use with paediatric patients, and current animal model research provides limited  
97 direct relevance to paediatric pathology. In clinical practice, there is significant interaction between  
98 cardiac and pulmonary function and the behaviour of the systemic vasculature during exercise  
99 training. This can result in the functional improvement in one part of the combined system, but  
100 detrimental effects on others (9). Clinicians therefore inevitably have to adopt very imprecise  
101 guidelines related to exercise prescription (12).

102

103 The use of modelling and simulation tools in clinical medicine is currently the subject of intense  
104 research interest both in the UK and internationally (13-17), and the adoption of a systems  
105 biomedicine approach to build and validate novel multi-scale, organ-level, integrated, re-usable and  
106 re-deployable models represents a paradigm shift in biomedical modelling and simulation. There are  
107 numerous organ level models in existence (18-21), however, to date there have been limited attempts  
108 to either integrate these or to apply them to real clinical applications. There is ongoing basic science  
109 and clinical trial work providing data on the micro (22) and macrovascular (23) changes associated  
110 with exercise. These data, although important, have yet to be integrated quantitatively with other data  
111 streams. In particular, there has been almost no previous work on the use of predictive modelling and  
112 simulation technologies for developing treatment strategies for CF patients.

113

114 Here, we present detailed data analysis of responses to progressive exercise in patients with CF, with  
115 a view of determining predictors of performance. We find that the time at which participants cross  
116 the anaerobic threshold (AT), as measured by means of gas exchange threshold (GET) is well  
117 correlated with overall performance. To gain further insight, we then develop a surrogate (statistical)  
118 model that allows us to evaluate how CF impairs exercise tolerance relative to increasing ventilatory  
119 and metabolic demands. Our modelling and analysis was based on data collected during cycling  
120 exercise form a CPET at different work rates (from resting to voluntary exhaustion) in young patients  
121 with CF. The outputs produced are discussed in this paper, with analyses focussing on pulmonary  
122 parameters.

123

## 124 **METHODS**

125 Before turning our attention to modelling, we perform an exploratory analysis of the available data in  
126 order to identify predictors of performance. This study was carried out in accordance with the

127 recommendations of the European Respiratory Society, written consent and assent was obtained from  
128 parent(s)/guardian(s) and participants, respectively. All participants' parents gave written informed  
129 consent in accordance with the Declaration of Helsinki. The protocol was approved by the South  
130 West NHS Research Ethics Committee. Data were collected from 15 children and adolescents with  
131 CF, who performed a valid (24) and reliable (25) combined ramp incremental and supramaximal  
132 (Smax) CPET to determine  $\dot{V}O_{2\max}$  and the GET. This protocol was performed on an electronically  
133 braked cycle ergometer, and required patients to perform an initial exhaustive ramp incremental test  
134 at a pre-determined rate between 10–25 W·min<sup>-1</sup>, in order to elicit exhaustion in approximately ten  
135 minutes (26). After a 3-min warm-up at 10-20 W, participants completed this incremental test to the  
136 point of volitional exhaustion, maintaining a cadence of 70–80 rpm throughout. Exhaustion was  
137 defined as a 10 rpm drop in cadence for five consecutive seconds, despite strong verbal  
138 encouragement. Active (5-min cycling at 20 W) and then passive seated recovery (10 min) then  
139 preceded the Smax bout. Smax verification consisted of a 3-min warm-up (10-20 W), followed by a  
140 “step” transition to a constant work rate corresponding to 110% peak power output (27). Upon  
141 volitional exhaustion (defined previously), a 5-min active recovery (slow cycling at 20 W) concluded  
142 the combined CPET session.

143

## 144 **MODEL SIMULATIONS**

145 Simulations are widely used in various fields of science and engineering because conducting physical  
146 experiments is too costly, or highly time-consuming, or even impossible in some cases (28). In the  
147 case of CPET in CF patients, there are also ethical considerations, since the test adds to the treatment  
148 burden many children and adolescents with CF already face.

149

150 Often, a primary goal of using model simulations is to perform quantitative studies such as  
151 uncertainty quantification or sensitivity analysis. Such studies are crucially important in biomedicine,  
152 since there exists significant variation both between and within patient groups. Through  
153 understanding and quantification of the uncertainty within the mathematical models, outcomes of  
154 patient-specific interventions can be better predicted. However, such investigations require a large  
155 number of runs that makes it impractical if each run takes more than a few seconds. To cope with this  
156 difficulty, one can use *emulators*, also known as *surrogates*, or *metamodels* or *response surfaces*  
157 (29). These provide a fast approximation of the input/output relation governed by the underlying  
158 simulator. The most important classes of surrogate models have been described elsewhere (30-32).

159

160 The surrogate model employed in this study is based on Gaussian processes (GP), which have  
161 become increasingly popular over the last decade (29). GPs have been used in a wide range of  
162 applications from wireless communication, to obtain position estimates for a mobile user (33);  
163 metallurgy, to model the development of microstructure (34); and in biology, to describe gene  
164 regulatory processes and cell growth (35-37).

165

166 The data analysis was performed using Python (Anaconda Software Distribution. Version 2-2.4.0.  
167 Continuum Analytics, 2016. URL <https://continuum.io>) and MATLAB and Statistics Toolbox  
168 Release 2016b, The MathWorks, Inc., Natick, Massachusetts, United States. The GP model simulator  
169 was implemented in R (R Core Team (2013). R: A language and environment for statistical  
170 computing. R Foundation for Statistical Computing, Vienna, Austria. URL [http://www.R-](http://www.R-project.org/)  
171 [project.org/.](http://www.R-project.org/))

172

## 173 **RESULTS**

### 174 ***Data Analysis***

175 To facilitate understanding, we first plot in **Figure 1(a)**, raw data displaying the performance of the  
176 participants. The work rate for each participant is increased at a rate that is either, a) dependent on  
177 their performance in previous tests, or b) when a prior test is unavailable, at a rate that is predicted to  
178 elicit exhaustion in approximately ten minutes (26). This is done in order to keep the expected  
179 duration of the test comparable to other participants. Note that this means that the total energy  
180 expended by a given participant is not based on the duration of the test alone. In **Figure 1(b)**, we  
181 show how participant age affects overall test performance. We observe a correlation between the two:  
182 the worst performing participants tend to be the youngest, but this effect is insignificant at older ages.  
183 The colour coordination used in this figure (red-worst performance → blue-average performance  
184 →green-best performance) will be used throughout the remainder of this section, where performance  
185 is quantified by the total energy transferred during the test.

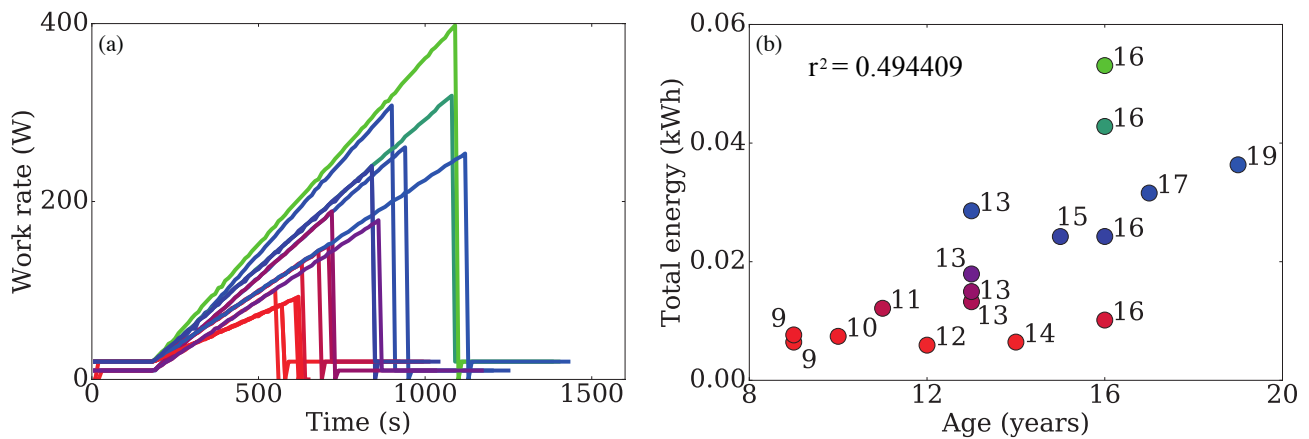

186

187 **Figure 1: (a) The work rate for each participant is increased at a rate dependent on their past**  
 188 **test performance. (b) Participant age is correlated with test performance for young**  
 189 **participants, but not for older ones.**

190

191 In **Figure 2**, we plot the ratio of  $\dot{V}O_2$  over total ventilation ( $\dot{V}E$ ) with respect to time. The markers on  
 192 each of the time traces indicate the time of volitional exhaustion for that participant. There are two  
 193 features that stand out from this figure. Firstly, participants who perform better have higher  $\dot{V}O_2/\dot{V}E$   
 194 ratios, suggesting that their oxygen uptake is more efficient than their poorer performing  
 195 counterparts. Secondly, in the recovery phase of the test (5 minutes following volitional exhaustion)  
 196 better performing participants exhibit a sharp decrease in  $\dot{V}O_2/\dot{V}E$ , which is not observed in the poor  
 197 performance group. Again, this suggests a more efficient utilisation amongst the former group and  
 198 that exhalation of  $CO_2$  is perhaps more significant to total breathing following the test.

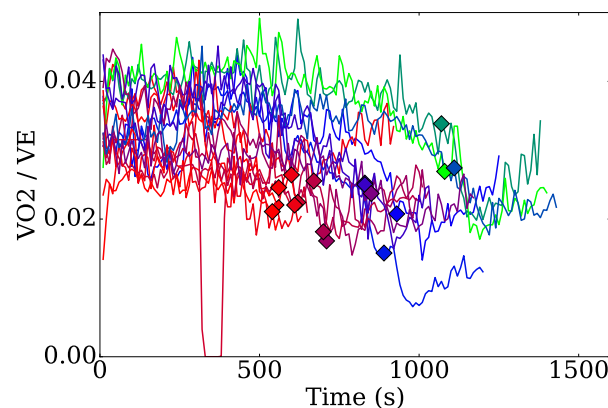

199

200 **Figure 2: Ratio of oxygen utilisation and total breathing throughout the test. Markers indicate**  
 201 **the volitional exhaustion times for each participant.**

202

203 We next examine the effect that breathing patterns have on participant performance. Two classical  
 204 prognostic measures used for patients with cystic fibrosis are the forced vital capacity (FVC), and the  
 205 forced expiratory volume in one second (FEV<sub>1</sub>). These measures have been shown to be well  
 206 correlated with mortality and overall fitness of CF patient groups (38-40). In **Figure 3**, we  
 207 demonstrate how these metrics are correlated with performance in the CPET test. In **Figure 3(a)**, we  
 208 observe good correlation between FVC and the maximum tidal volume (TV) of breathing achieved  
 209 throughout the test. This is unsurprising since participants are likely to be trying to maximise their  
 210 breathing depth close to their exhaustion point. However, notice that, although the group with low  
 211 FVC performed poorly, this measure was unable to separate other participants. **Figure 3(b)** reiterates  
 212 this result and also highlights the high correlation between FEV<sub>1</sub> and FVC.

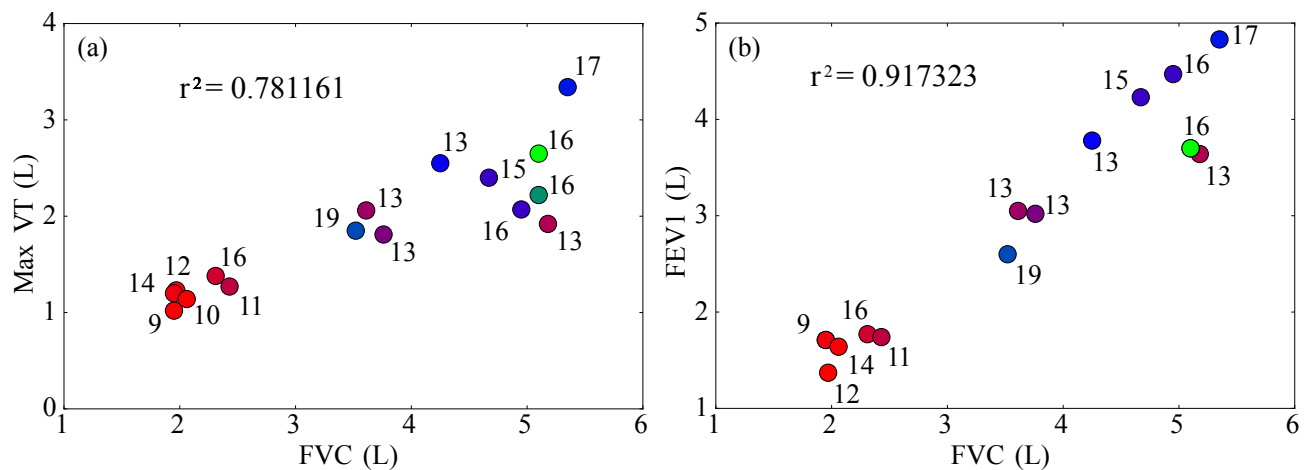

213  
 214 **Figure 3: (a) Correlation of FEV<sub>1</sub> with the maximal tidal volume achieved throughout the test.**  
 215 **(b) Correlation between FEV<sub>1</sub> and FVC is high. Note that, although FVC and FEV<sub>1</sub> are good**  
 216 **predictors of poor test performance, they are unable to distinguish better performing**  
 217 **participants.**

218  
 219 In order to better classify the performance of the participants, we must instead look for other factors.  
 220 In **Figure 4**, we present the total breathing rate against the oxygen consumption throughout the test.  
 221 In **Figure 4(a)**, we find a strong relationship between test performance and respiratory pattern. Note  
 222 that the curvature of the graphs suggests that an exponential fit, rather than a linear one, is most  
 223 appropriate for these data. In order to test this, we take logarithms of the data and perform a linear  
 224 regression, ignoring the first 180s of the test since participants are here in the warm up phase (work  
 225 rate is not increasing) and the final 60s of the data prior to volitional exhaustion, since participants  
 226 pass their respiratory compensation point, inducing hyperventilation and erratic breathing. The



227 results of the fit are shown in **Figure 4(b)** and we can see more clearly the association of  
 228 performance on breathing pattern.

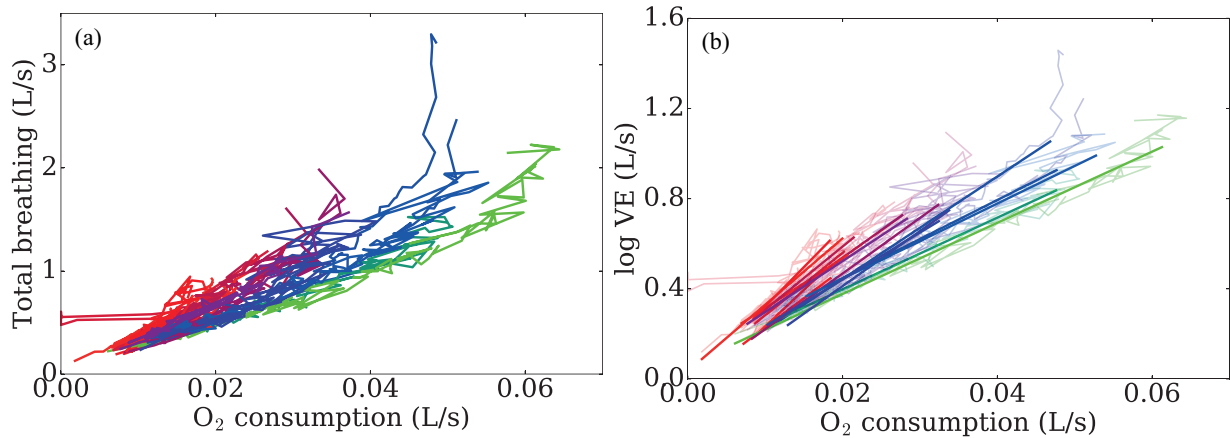

229  
 230 **Figure 4: (a) Total ventilation plotted against oxygen utilisation. We observe that breathing**  
 231 **pattern is strongly correlated with test performance. (b) Exponential curves are fitted through**  
 232 **the raw data, further highlighting this dependence.**

233  
 234 From the fitted curves, we can further explore the dependence of breathing patterns on performance.  
 235 Firstly, in **Figure 5(a)**, we plot the slope of the fitted curve against the total energy transfer. We find  
 236 that the slope of the curve of  $\log \dot{V}E$  against  $\dot{V}O_2$  alone does not capture all of the variation in energy,  
 237 which is highlighted by the low R-squared value (0.68). Instead, we plot in **Figure 5(b)** the oxygen  
 238 consumption at a fixed rate of breathing against the total energy. Here, we find a good  
 239 characterisation of the overall performance, with a much higher R-squared value (0.86), confirming  
 240 that those who utilise oxygen more efficiently perform better.

241

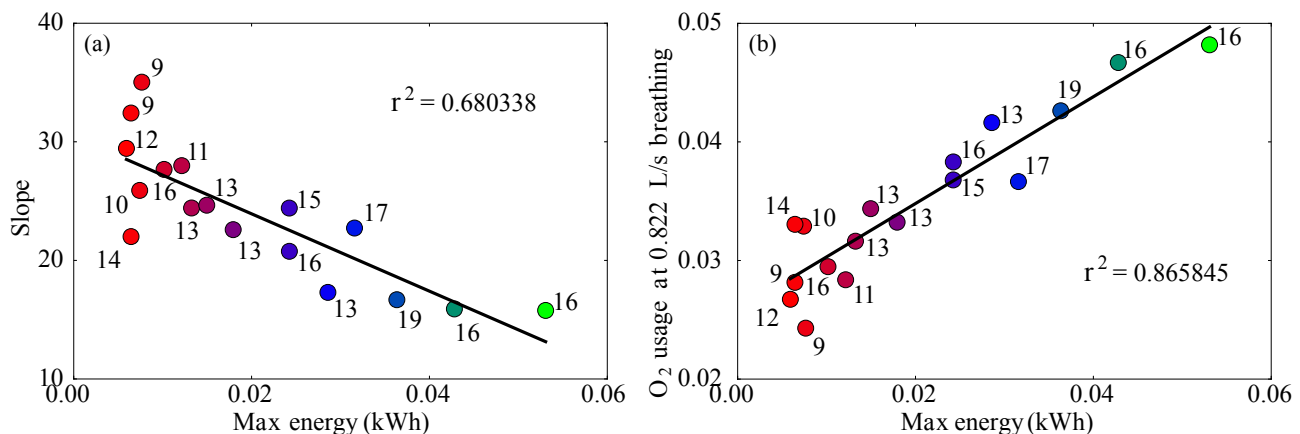

242  
 243 **Figure 5: Slope of the fitted curves ( $\log \dot{V}E$  against  $\dot{V}O_2$ ) from Fig. 4(b) plotted against the total**  
 244 **energy transfer during the test. We find a relatively poor characterisation of the variance**

245 **between performances. (b) By instead plotting the oxygen consumption at a fixed rate of**  
246 **breathing, we better capture differences in performance.**

247

248 Next, we examine the specific patterns of breathing exhibited by the participants, in particular,  
249 focussing on breathing depth and frequency. Initial characterisations of these patterns seem to  
250 provide little information, as indicated in **Figure 6(a)**. However, when we now also include  
251 dependence of oxygen consumption, we find a near perfect classification of participants into the  
252 lowest performing groups, the best performing groups and the middle group. These data are  
253 displayed in **Figure 6(b)**. Note that in this figure, the trajectories appear to be evolving on a planar  
254 manifold, suggesting significant co-dependence between these three variables.

255

256

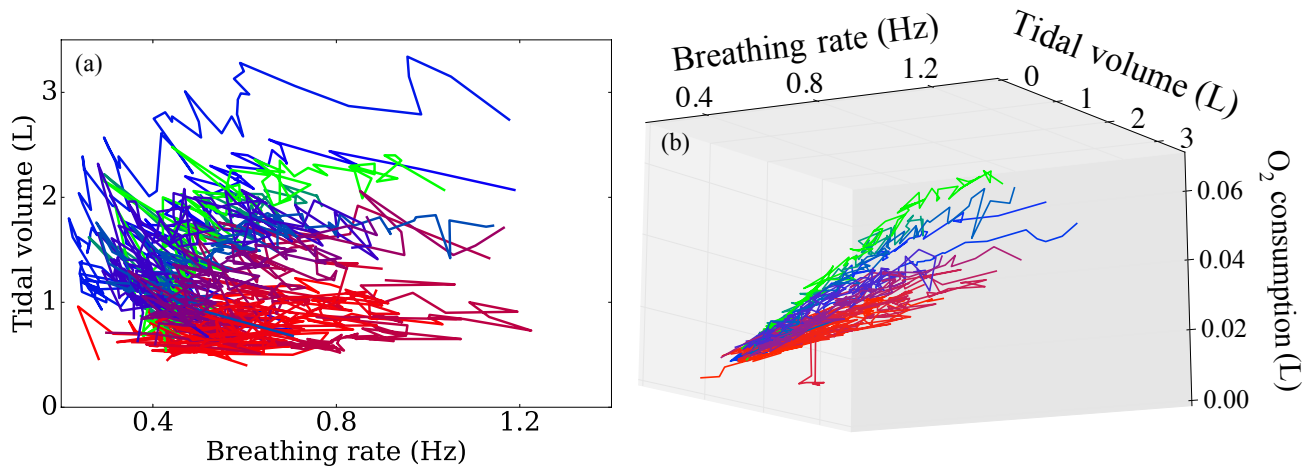

257

258 **Figure 6: (a) Breathing patterns subdivided into the breathing rate and tidal volume. These**  
259 **data appear uninformative for predicting test performance. (b) With the additional inclusion of**  
260 **the oxygen consumption at a fixed rate of breathing, we find that these variables now almost**  
261 **perfectly capture variation in participant performance.**

262

263 Given that there appears to be co-dependence between the variables used in **Figure 6(b)**, a sensible  
264 next step is to use principal component analysis (PCA) to account for these dependencies. By  
265 projecting the data onto their principal components, we show in **Figure 7** how well these capture the  
266 variation in participant performance. Given that there are only three independent variables in our  
267 analysis, it is natural to use spherical polar coordinates to show how these quantify performance. The  
268 first of these components,  $\theta$ , captures over 90% of the variation in performance (**Figure 7a**), as does

269 the normal component in the direction of breathing frequency (**Figure 7b**). These results further  
 270 indicate the importance of breathing frequency, together with co-variation of oxygen consumption  
 271 and tidal volume as predictors of test performance.

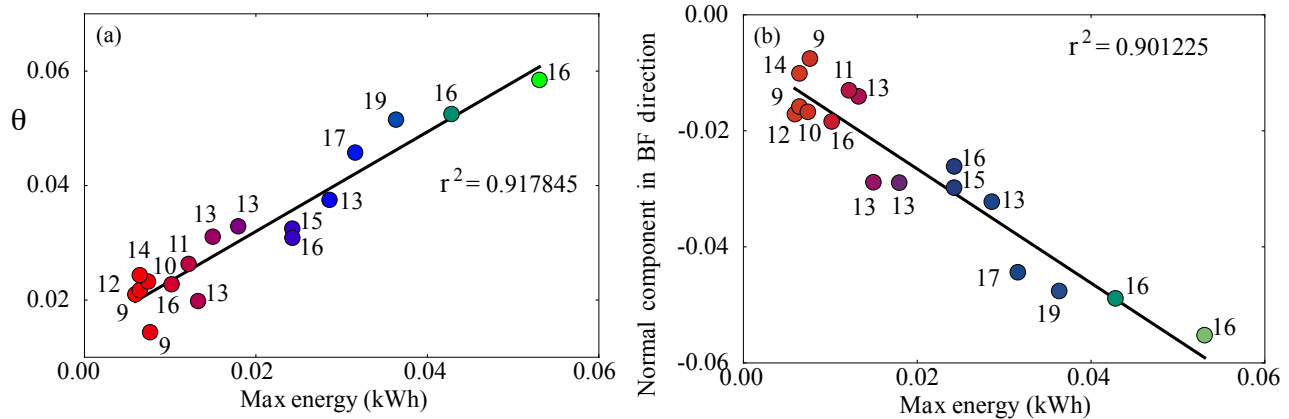

272  
 273 **Figure 7: First of the principal components obtained via PCA accounts for over 90% of the**  
 274 **variation in test performance. (b) Similar levels of variance are accounted for by taking only**  
 275 **the normal component of the first principal component in the breathing frequency direction.**

276  
 277 ***Gas Exchange Threshold***

278 Under steady state levels of exercise, the metabolic rate of production of  $\text{CO}_2$  is assumed to be  
 279 proportional to the utilisation rate of  $\text{O}_2$  via the cellular respiratory quotient, since (after the initial  
 280 rest-work transition) adenosine triphosphate (ATP) is replenished primarily via aerobic metabolism  
 281 pathways. As the work rate increases, this pathway becomes unable to supply sufficient ATP to  
 282 satisfy the required amount of energy and anaerobic pathways have to contribute to overcome the  
 283 shortfall. In doing so, they increase the levels of waste products, such as lactate and also increase the  
 284 overall production rate in  $\text{CO}_2$ . The point at which this occurs is known as the anaerobic threshold  
 285 (AT) or sometimes referred to as the lactate threshold. However, this is difficult to directly measure  
 286 *in vivo* during exercise, and as such the GET is utilised as a non-invasive surrogate of the AT (41).

287  
 288 The time at which participants cross the anaerobic threshold is well correlated with overall  
 289 performance, as shown in **Figure 8(a)**, due to the fact that the anaerobic pathways are less efficient at  
 290 producing ATP and because build-up of lactate contributes significantly to fatigue. One of the major  
 291 contributing factors in defining AT is  $\dot{V}\text{O}_{2\text{max}}$ , since this is indicative of the limit of the rate of  
 292 oxidative phosphorylation. It thus comes as little surprise that  $\dot{V}\text{O}_{2\text{max}}$  is the best single predictor of  
 293 CPET performance, as shown in **Figure 8(b)**.

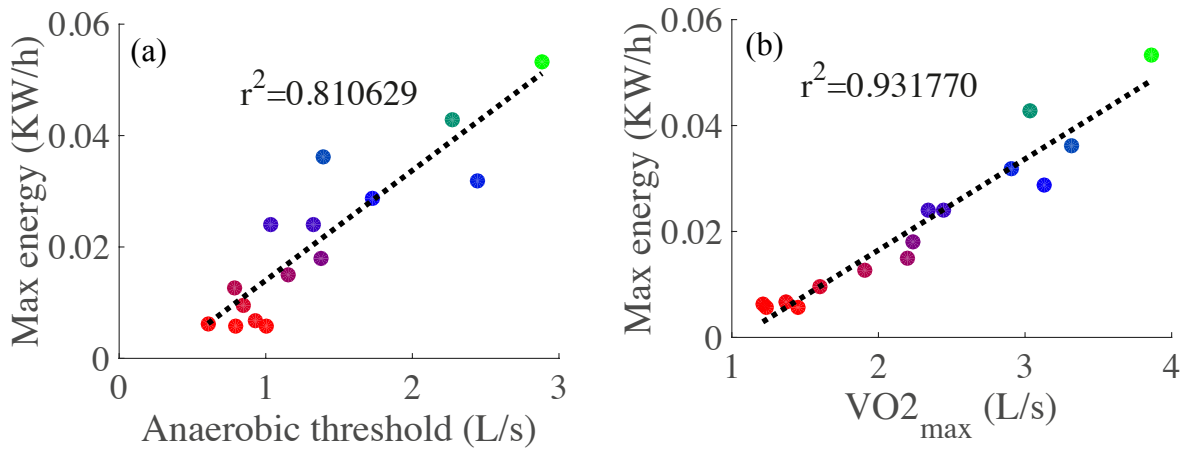

294

295

296 **Figure 8: (a) Quantifying the relationship between the anaerobic threshold and overall test**  
 297 **performance. Anaerobic thresholds were calculated using an automated procedure based on**  
 298 **previous methods (41) (b)  $\dot{V}O_{2\max}$  is the best single predictor of overall test performance.**

299

### 300 ***Gaussian Processes-based Modelling***

301 A Gaussian Process (GP) defines a probability distribution over functions where the true function is  
 302 considered as a particular sample path. In our modelling, we attempt to describe the influence of  
 303 breathing patterns and  $\dot{V}O_2$  on the AT, since this is shown to correlate well with overall test  
 304 performance (see **Figure 8**). In mathematical terms, we treat AT as our scalar output variable, with  
 305 input variables comprising: baseline breathing rate and tidal volumes, and  $O_2$  consumption rates at a  
 306 fixed ventilation rate, FVC, FEV<sub>1</sub>, and the rate of changes in breathing rate and tidal at exercise  
 307 onset, using the slopes calculating in **Figure 4(b)**. Thus, we have an output variable dependent on  
 308 seven input variables, which we conveniently store in a vector  $\mathbf{x} \in D \subset \mathbb{R}^d$ , with  $d=7$ . We now  
 309 assume that there exists a ‘true’ function  $f: D \rightarrow \mathbb{R}$ , such that  $AT = f(\mathbf{x})$ .

310

311 A GP is fully specified by its mean,  $\mu$ , and covariance  $K$ , which are both functions of the input  
 312 variables:  $\mu = \mu(\mathbf{x})$ ,  $K = K(\mathbf{x}, \mathbf{x}')$ . Specifically, if  $Y$  is a GP, then we write:

313

$$314 \quad Y \sim GP(\mu, K): \quad \mu = E[Y(\mathbf{x})], \quad K(\mathbf{x}, \mathbf{x}') = \text{Cov}(Y(\mathbf{x}), Y(\mathbf{x}')), \quad \mathbf{x}, \mathbf{x}' \in D$$

315

316 The above can be regarded as prior distribution over function spaces. This can be seen more clearly  
 317 in **Figure 9(a)**. In this subfigure, which shows a generic example of a GP, the bold red line is the  
 318 ‘true’ function  $f$ . Note that the true function is unknown – our aim is to construct a model that

319 approximates it. The thin grey lines are sample paths of a GP with a zero mean prior and a constant  
 320 prior covariance function. For exposition purposes, the example plot is restricted to the case  $d=1$ , but  
 321 the approach is unchanged for  $d > 1$ . In principle,  $\mu$  could be any function, for practical purposes,  
 322 polynomial regressions are common choices. The choice of covariance function reflects our prior  
 323 belief about the structure of  $f$  (such as the level of smoothness) and therefore has a crucial influence  
 324 on our modelling. A typical choice for the covariance function is the squared-exponential kernel,  
 325 given by:

326

$$327 \quad K(\mathbf{x}, \mathbf{x}') = \sigma^2 \prod_{i=1}^d \exp\left(-\frac{|x_i - x'_i|^2}{2\Phi_i^2}\right)$$

328

329 Here,  $\sigma$  controls variability of  $Y$  along the y-axis while  $\Phi_i > 0, i = 1, \dots, d$ , scale the distance  
 330 measure for each input dimension. A more thorough exposition of common choices for the  
 331 covariance function may be found in (42).

332

333 Thus far, we have defined the prior distribution for the GP. It is clear from **Figure 9(a)** that, in  
 334 general, prior distributions are unlikely to provide a good approximation to the true function  $f$ . We  
 335 can incorporate data (or evaluation of  $f$  at specific points), with our prior distribution to give a  
 336 posterior distribution, following a Bayesian framework. The resulting posterior distribution of the  
 337 GP, conditioned on the data, will be much closer to the true function.

338

339 Let  $\mathbf{y} = \{f(\mathbf{x}^1), \dots, f(\mathbf{x}^n)\}$  be a set of function evaluations at  $n$  locations  $\mathbf{X} = \{\mathbf{x}^1, \dots, \mathbf{x}^n\}$ . Here,  
 340 function evaluations correspond to the AT location for a set of patients during the CPET. Predicting  
 341 with GP is obtained by conditioning  $Y$  on sample points  $\Omega = \{\mathbf{X}, \mathbf{y}\}$ . For any (new)  $\mathbf{z} \in D$ , the  
 342 posterior distribution of  $Y(\mathbf{z})|\Omega$  has a normal distribution with the following mean,  $m$ , and variance,  
 343  $s^2$ :

$$344 \quad m(\mathbf{z}) = \mu(\mathbf{z}) + K(\mathbf{z}, \mathbf{X})^\top K(\mathbf{X}, \mathbf{X})^{-1} (\mathbf{y} - \boldsymbol{\mu}), \quad (1)$$

$$345 \quad s^2(\mathbf{z}) = K(\mathbf{z}, \mathbf{z}) - K(\mathbf{z}, \mathbf{X})^\top K(\mathbf{X}, \mathbf{X})^{-1} K(\mathbf{z}, \mathbf{X}), \quad (2)$$

346

347 where  $^\top$  denotes the transpose operator,  $^{-1}$  is the inverse operator and  $\boldsymbol{\mu} = \mu(\mathbf{X})$  is the vector of the  
 348 mean function at  $\mathbf{X}$ . In addition,  $K(\mathbf{z}, \mathbf{X})$  and  $K(\mathbf{X}, \mathbf{X})$  are the covariance vector between  $Y(\mathbf{X})$  and  $Y(\mathbf{z})$

349 and the covariance matrix between the observations. **Figure 9(b)** shows an example of incorporating  
 350 sample points to update the prior distribution shown in **Figure 9(a)**. In this generic example, the  
 351 function  $f$  is evaluated at five distinct values of  $\mathbf{x}$ , and the mean and variance of the GP are updated  
 352 using (1)-(2).  
 353

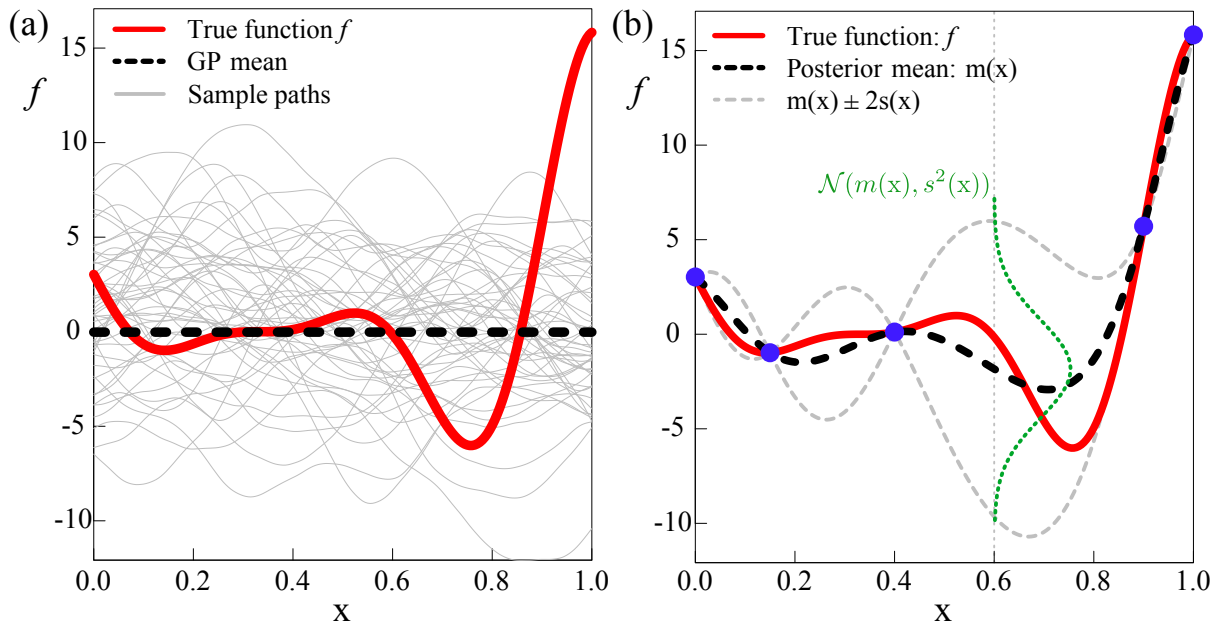

354 **Figure 9: GP is a probability distribution on function spaces. The thick solid red line is the true**  
 355 **function  $f$  and the thick dashed black line is the GP mean. (a) Thin grey lines show sample**  
 356 **paths of a prior GP whose mean is zero. (b) Blue bullets indicate five data points sampled from**  
 357  **$f$ . The GP mean and covariance are updated using these sample points. The thin grey dashed**  
 358 **lines show  $m(x) \pm 2s(x)$ .**  
 359

360  
 361 At the evaluated points, indicated in blue (colour online), the true value of  $f$  is known and so the  
 362 variance of the GP at these points vanishes and  $\mu(\mathbf{X}) = f(\mathbf{X})$ . In between these points, the variance  
 363 increases, dependent on the distance from an evaluated point. The mean of the GP, shown by the  
 364 thick black dashed line now approximates the true function much more closely (recall that the prior  
 365 mean function in **Figure 9(a)** was zero everywhere), and matches exactly at the evaluated points. The  
 366 approximation can be further improved by incorporating more data (function evaluations),  
 367 particularly around those input values for which the variance is high. Thus, as more data becomes  
 368 available, the model is iteratively improved.

369  
 370 **Justification of Variables**

371 In our simulator, we have used the AT as our output (dependent) variable. Another choice for this  
372 could be the performance in the CPET or  $\dot{V}O_{2max}$ , since these are the primary biomarkers for gauging  
373 aerobic fitness. However, the use of the GET has been shown to have high agreement with the lactate  
374 threshold (another surrogate for the AT), and related to disease severity in CF (43). Furthermore, as  
375 reported in **Figure 8(a)**, the AT location for a given patient correlates well with their overall  
376 performance in this test. Furthermore, by constructing a predictive model to approximate the AT  
377 values for a patient, we can hope to further extend this to identify contributions of aerobic and  
378 anaerobic pathways in supplying ATP to meet the demand imposed during the exercise test.

379

380 The initial exploration of results highlighted that both ventilation parameters and metabolic rates of  
381  $O_2$  consumption were the primary factors influencing test performance. It is clear that  $\dot{V}O_2$  should  
382 play a significant role in determining the AT location, since it is a proxy for oxidative  
383 phosphorylation which is the main pathway for ATP synthesis in steady state exercise. As a measure  
384 of oxygen uptake efficiency in our model, we use the oxygen consumption rate at a fixed total  
385 ventilation rate (that being 0.822 L/s) as an input (independent) variable for each patient.

386

387 There are a number of ventilatory input variables incorporated in our simulator. Given their potential  
388 importance as clinical biomarkers, highlighting the limitations of lung capacity and function, we  
389 include FVC and  $FEV_1$  as input (independent) variables. During the aerobic exercise test, participants  
390 spend three minutes cycling at a minimal work rate, over which we quantify their baseline breathing  
391 frequency and baseline tidal volume by taking the means of these variables over this period. To  
392 capture the dynamics response associated with the exercise, the rates of change of breathing  
393 frequency and tidal volume are calculated, based on the fits obtained in **Figure 4(b)**. The rates of  
394 change of these ventilatory variables indicate how participants respond to changes in workload and  
395 were shown in **Figure 6(b)** to discriminate between participant performances. Moreover, differences  
396 in rates of change of breathing frequency and tidal volume have previously been shown to be  
397 significantly different between control groups and CF groups (44), suggesting that these are  
398 potentially key biomarkers for assessing aerobic fitness in patients with CF.

399

#### 400 ***GP Emulator Performance***

401 The GP emulator was constructed using the data presented above, with AT calculated using  
402 previously described methods (41). These data were used to train the emulator. For the prior  
403 distributions, a first order polynomial regression was used for the mean, whilst a squared-exponential

404 kernel with  $\sigma$  and  $\Phi$  provided via maximum likelihood estimation was used as the prior covariance.  
405 Since in this pilot study, we have a small number of participants, we use leave-one-out cross-  
406 validation to assess the accuracy of our emulator, that is, for each patient, we use the emulator trained  
407 against the remainder of the sample points to approximate the AT value for that patient, given their  
408 input variables. The results of this are presented in **Figure 10(a)**, in which we also plot the 95%  
409 confidence intervals, with relative percentage errors demonstrated in **Figure 10(b)**.  
410  
411

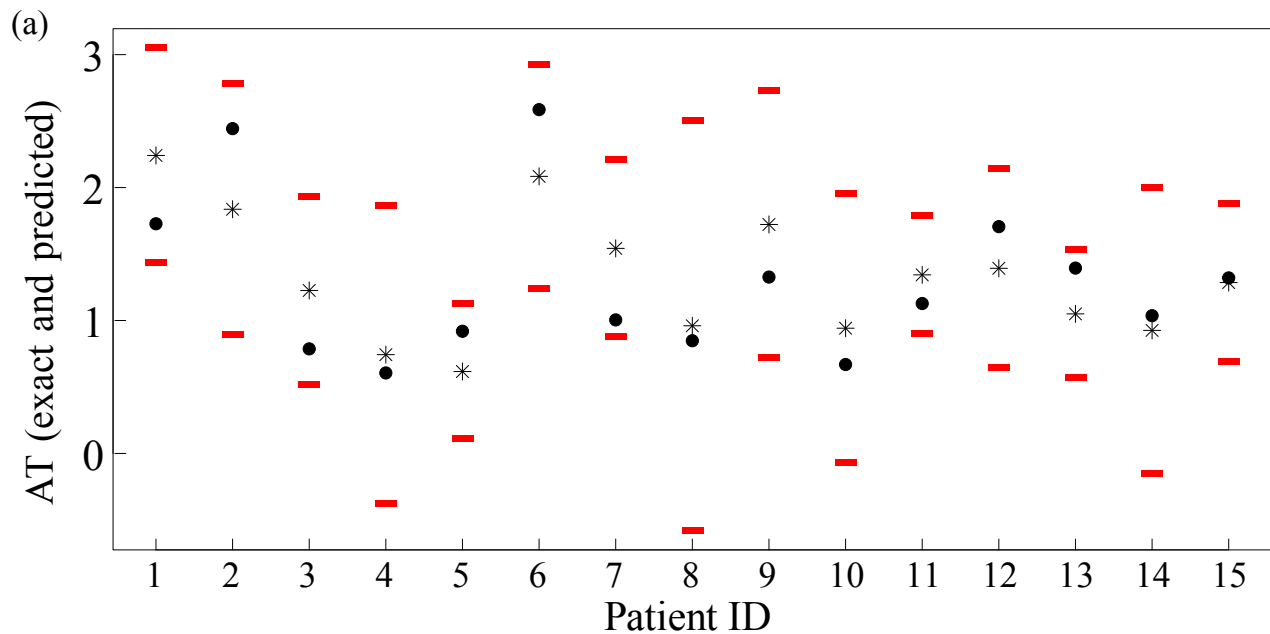

412

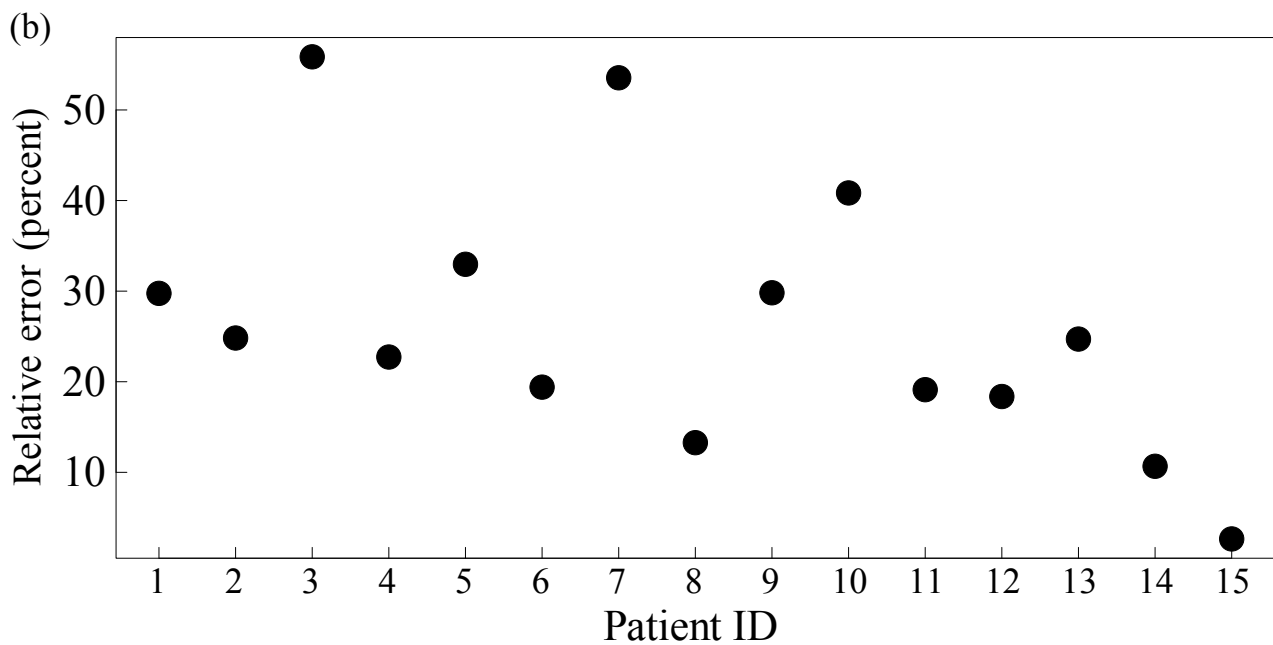

413

414



415

416 **Figure 10: (a) Predictions (asterisks) vs. exact values (bullets). Red bars show the 95%**  
417 **confidence intervals,  $m_i(x_i) \pm 1.96 s_i(x_i)$  around the predicted value, where  $m_i$  and  $s_i$  are GP**  
418 **prediction mean and standard deviation based on all but the  $i$ 'th data point. (b) Relative**  
419 **prediction error expressed as a percentage of the true value  $f(x_i)$ .**

420

421 The emulator has reasonable accuracy, in spite of the small sample size. In general, for high accuracy  
422 in GP emulator, the number of sample points (corresponding to the number of patients in our case)  
423 should be at least ten times larger than the number of input variables (45). Clearly, there is a need to  
424 acquire further data points to improve the predictive capabilities of the emulator. For each patient, the  
425 95% confidence interval around the predicted point contains the true value. Moreover, the relative  
426 errors for many patients is small (considering the low sample size), though we note that some  
427 patients, (3 and 7), the error is high. This highlights a need to extend this study to include more data  
428 to refine estimates around these points, particularly to deal with the high variability of lung function  
429 parameters in this patient group (46).

430

## 431 **DISCUSSION**

432 Our primary modelling aim is to eventually use the model to evaluate how CF impairs exercise  
433 tolerance relative to increasing ventilatory and metabolic demands. Our predictive model could also  
434 be used to evaluate therapies and their effect on exercise performance. Ultimately, we hope that this  
435 will form a series of steps to design better exercise treatment that is tailored to specific individual  
436 needs relative to patient's treatment therapies, a treatment modality that is affordable, and  
437 personalised (47).

438

439 The data analysis and modelling results have highlighted the dependence of CPET performance on  
440 variables associated with ventilation and metabolic rates of  $O_2$  consumption. Whilst these  
441 observations are, in themselves, not novel, we believe that this is the first attempt to mathematically  
442 model the relationship between ventilatory dynamics,  $\dot{V}O_2$  and performance in CPET within a group  
443 of children and adolescents with CF. Whilst it is clear that there is much work to be done in this area,  
444 we hope that this will serve as a starting point for improved modelling, not only in the arena of GP  
445 emulators, but also in the domain of mechanistic modelling, which we shall describe briefly.

446

447 *Perspectives for GP improvements*

448 At present, the GP model is conditioned on specific data points for each patient. An improvement to  
449 the GP could be made by instead conditioning with respect to distributions. Given that repeated tests  
450 are often performed for the same individual, so that multiple sample points are provided for each  
451 participant, we can consider a fit to a probability distribution capturing the variability in the identified  
452 variables. This approach has advantages compared to standard GP models, such as avoiding  
453 problems associated with overfitting and regularisation (which is important for the inverting ill-  
454 conditioned covariance matrices that often arise during the application of (1)-(2), (48).

455

### 456 *Perspectives for mechanistic modelling*

457 In order to better understand and characterise the difference between performances, it would be  
458 extremely useful to construct and simulate a mechanistic mathematical model, based upon on  
459 ordinary differential equation (ODE) framework, describing the relationship between the  
460 cardiopulmonary system and the metabolic dynamics of skeletal muscle. By describing the  
461 relationships between different organ-level systems, the model would be able to identify the patient-  
462 specific rate-limiting factors defining aerobic fitness. Moreover, analysis of the model could be used  
463 to suggest treatment strategies to improve these factors and thus predict how patients will improve  
464 under such regimes.

465

466 At the individual organ level, there are a plethora of models describing individual dynamics of the  
467 level of the heart (49-52), lung (53-56) and systemic metabolic demand (57-63). There also exist a  
468 number of models describing such interactions between cardiopulmonary and metabolic systems (64-  
469 68) in a variety of settings, including heart failure and mechanical ventilation. A core feature in all of  
470 these models is the nonlinear interaction between the constituent model compartments that  
471 encompass the distinct tissues. An important consequence of this is that the model must be studied as  
472 whole, in an integrated fashion, to truly understand the body's response to exercise.

473

474 With respect to the present question, there are a number of limitations of the existing modelling  
475 approaches. Most significantly, none have been designed with either an adolescent, or a CF patient  
476 group in mind, and the nuances of these patient groups will have to be factored into to any model  
477 development. In particular, these models have relatively simple, empirical models to describe  
478 changes in ventilation, which may not capture breathing dynamics of our patient group well.  
479 Moreover, to the best of our knowledge, no model considers the changes in ventilation separated into

480 breathing frequency and depth that have been shown by us and others (44) to be critical to overall test  
481 performance.

482

483 In our analysis, we have demonstrated that the AT or GET location is a critical factor in determining  
484 overall patient aerobic fitness. Many of the mathematical exercise models describe only steady-state  
485 exercise, in which aerobic pathways meet most of the ATP demand (64-68). As such, these models  
486 are inadequate to capture the dynamics we describe here. Another common topic of study is the  
487 dynamic response at exercise onset, which again, does not meet the current need to describe the AT  
488 crossing point (69-72).

489

490 Of the mathematical models that describe the contribution of anaerobic pathways to ATP production,  
491 some assume that the shortfall in meeting ATP demand via oxidative phosphorylation is met entirely  
492 by anaerobic pathways (73), yet this is clearly not so, since ATP levels in skeletal muscle post-  
493 exercise may be up to 30% lower than pre-exercise values (74). Mathematical models that factor in  
494 fatigue brought about by anaerobic metabolism are generally phenomenological in nature, and it is  
495 difficult to quantify these models against real patient data (73, 75, 76), and these models mostly fall  
496 outside the arena of ODE-based modelling and so dynamical properties are difficult to infer from  
497 them.

498

499 Developing a mathematical model to describe the integrated behaviour of all of the relevant organs,  
500 whilst remaining biophysically plausible, but without requiring excessive or invasive  
501 parameterisation is a difficult task. The proposed model should include descriptions of the  
502 cardiovascular system, the ventilatory system and simple models of metabolism at the tissue level.  
503 Specifically, dynamic variables should include alveolar, arterial, venous and tissue level partial  
504 pressures/concentrations of  $O_2$  and  $CO_2$ , cardiac output, ventilation and metabolic rates oxygen  
505 utilisation and  $CO_2$  production. Partial alveolar gas pressures can be linked to data collected during  
506 the test, and the work rate can then be provided as inputs to the model. Note that these variables are  
507 similar to those included in previously defined models (64-68) and the aim is to extend these to  
508 describe the dynamics observed in patients with CF. The proposed model schematic is displayed in  
509 **Figure 11.**

510

511 Of critical importance to the overall model construction is the development of a simple, yet realistic  
512 model of cellular metabolism, to overcome the issues discussed earlier. The model should respect the

513 different metabolic processes that occur in the muscle tissue, in particular: glycolysis,  
514 phosphocreatine breakdown and synthesis and oxidative phosphorylation, in a simplistic fashion that  
515 is amenable to being fit to CPET data. Whilst there are models that describe the biochemical  
516 reactions associated with these processes, and importantly, their stoichiometry (58, 61, 63, 67, 77),  
517 quantifying their associated rate constants *in vivo* is a near-impossible task, and so efforts must be  
518 made to develop a model that incorporates the relevant metabolic dynamics whilst being simple  
519 enough to be fit to data.

520

521 With knowledge of the integrated system, attempts can also be made to describe other important  
522 exercise-based processes, such as lactate buffering and recycling (as a fuel source) (61, 78, 79) and  
523 the overall muscle fatigue brought about by the combination of all of these factors. Only by  
524 systematically exploring the dependence of aerobic fitness of all of the factors described in this  
525 section can we begin to understand the system in an integrated fashion.

526

527

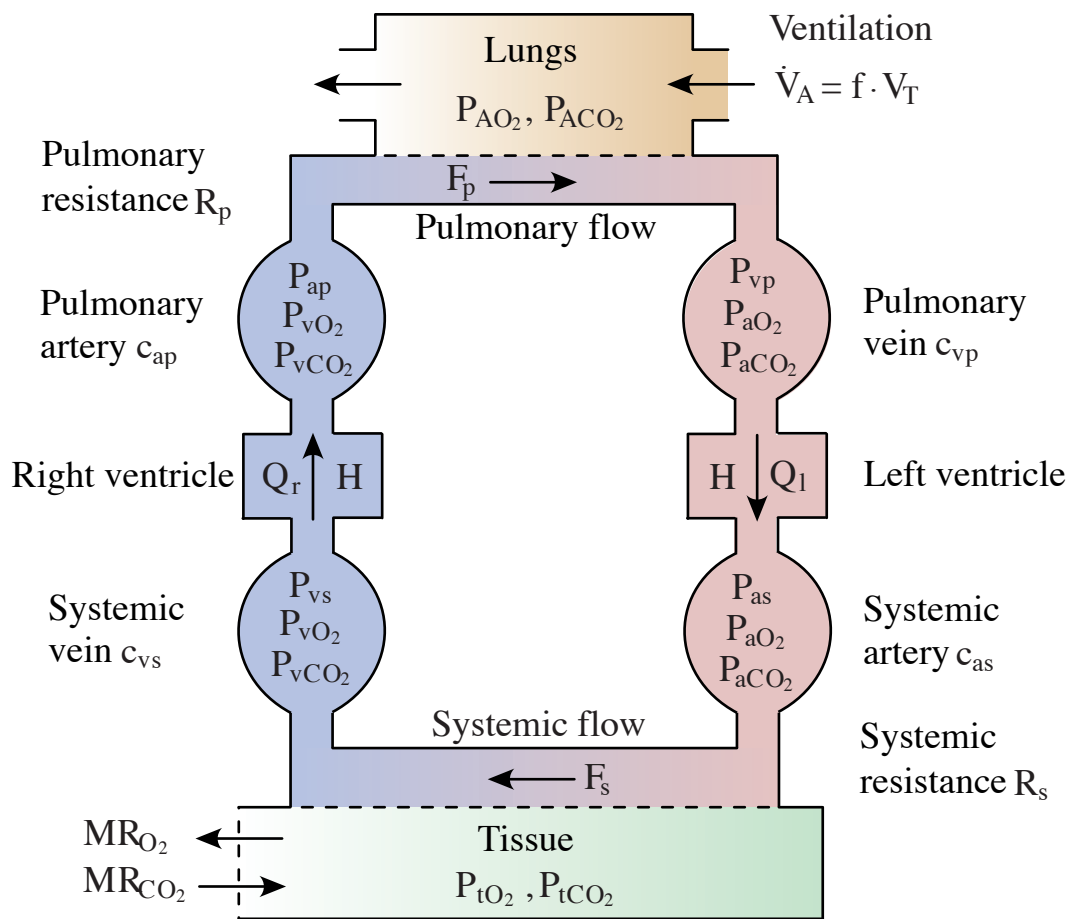

528

529

530 **Figure 11: Schematic of the variables and processes in the proposed ODE-based mathematical**  
 531 **model. Adapted from Timischl (1998) (66) and Batzel *et al.* (2005) (80).**

532

533 **LIMITATIONS**

534 A limitation with the current study is the utilisation of a relatively small sample size, and this may be  
 535 contributing towards aforementioned errors. Future studies should seek to utilise CPET collected  
 536 annually in CF centres, to develop larger, multi-centre, samples whereby a uniform exercise protocol  
 537 is utilised. Given that utilisation of CPET is now recommended and endorsed for regular use by  
 538 international medical societies (81), and individual CF centres are reporting upon experiences of  
 539 using CPET (82), large-scale utilisation of such data is a feasible target.

540

541 The findings presented may be derived from a smaller sample, and therefore the models presented are  
 542 only preliminary results for this patient cohort; however, the study provides a unique examination  
 543 into the aerobic and anaerobic signatures of individual patients with CF in response to progressive  
 544 exercise.

545

546 Finally, whilst this study provides an insight into metabolic process during exercise, future research  
547 and models must account for additional variables predictive of function and mortality (e.g. genotype,  
548 body composition, pancreatic sufficiency, infection status, exacerbations (83, 84)) and co-morbidities  
549 (CF-related diabetes (85), pulmonary arterial hypertension (86)) existent within CF, notably those  
550 that may affect exercise tolerance.

551

## 552 **CONCLUSIONS**

553 Benefits of modelling include the ability to utilise existing data sets at a time when there are limited  
554 resources. There is also a call to reduce the burden on sick patients (EU directive). As models  
555 improve and the quality of fits to data are improved, the models can be used in a prognostic setting to  
556 predict potential improvements in aerobic fitness that may arise due to therapeutic intervention.  
557 Moreover, with proper mechanistic modelling of the primary organs affected in CF, there exists the  
558 potential to optimise treatment for this patient group by identifying the limiting factors of aerobic  
559 fitness.

560

## 561 **CONFLICT OF INTEREST**

562 *The authors declare that the research was conducted in the absence of any commercial or financial*  
563 *relationships that could be construed as a potential conflict of interest.*

564

## 565 **AUTHOR CONTRIBUTIONS**

566 CAW conception, design of the work, data collection, analysis, interpretation, manuscript drafting,  
567 final approval of the version to be published, agreement to be accountable for all aspects of the work  
568 in ensuring questions related to the accuracy and integrity of any part of the work are appropriately  
569 investigated and resolved; KTA data interpretation, critical review of the paper, final approval of the  
570 version to be published, agreement to be accountable for all aspects of the work in ensuring questions  
571 related to the accuracy and integrity of any part of the work are appropriately investigated and  
572 resolve; OWT data collection, analysis, interpretation, final approval of the version to be published,  
573 agreement to be accountable for all aspects of the work in ensuring questions related to the accuracy  
574 and integrity of any part of the work are appropriately investigated and resolved; KW supervision of  
575 work organization and development, data analysis, interpretation, manuscript drafting, final approval  
576 of the version to be published, agreement to be accountable for all aspects of the work in ensuring  
577 questions related to the accuracy and integrity of any part of the work are appropriately investigated

578 and resolved. HM construction of GP emulator, final approval of the version to be published,  
579 agreement to be accountable for all aspects of the work in ensuring questions related to the accuracy  
580 and integrity of any part of the work are appropriately investigate and resolved.

581

## 582 **FUNDING**

583 The present work was funded by an ISSF2 Wellcome Trust Seed Corn grant.

584

## 585 **ACKNOWLEDGMENTS**

586 We are grateful to the participants for volunteering their time to this project, especially the young  
587 patients with CF. KW was generously supported by the Wellcome Trust Institutional Strategic  
588 Support Award (WT105618MA). KTA gratefully acknowledges the financial support of the EPSRC  
589 via grant EP/N014391/1.

590

## 591 **Supplementary Material**

592 Supplementary Material should be uploaded separately on submission, if there are Supplementary  
593 Figures, please include the caption in the same file as the figure. Supplementary Material templates  
594 can be found in the Frontiers Word Templates file.

595 Please see the [Supplementary Material section of the Author guidelines](#) for details on the different  
596 file types accepted.

597

598

599

## 600 **REFERENCES**

- 601 1. Cystic Fibrosis Trust. UK Cystic Fibrosis Registry 2015 Annual Data Report. 2016.
- 602 2. Pérez M, Groeneveld IF, Santana-Sosa E, Fiuza-Luces C, Gonzalez-Saiz L, Villa-Asensi JR,  
603 et al. Aerobic fitness is associated with lower risk of hospitalization in children with cystic fibrosis.  
604 *Pediatric Pulmonology*. 2014;49(7):641-9.
- 605 3. Andréasson B, Jonson B, Kornfält R, Nordmark EVA, Sandström S. Long-term Effects of  
606 Physical Exercise on Working Capacity and Pulmonary Function in Cystic Fibrosis. *Acta Paediatrica*.  
607 1987;76(1):70-5.

- 608 4. Orenstein DM. Exercise conditioning and cardiopulmonary fitness in cystic fibrosis. The  
609 effects of a three-month supervised running program. *Chest*. 1981;80(4):392.
- 610 5. Salh W, Bilton D, Dodd M, Webb AK. Effect of exercise and physiotherapy in aiding sputum  
611 expectoration in adults with cystic fibrosis. *Thorax*. 1989;44(12):1006-8.
- 612 6. Schneiderman-Walker J, Pollock SL, Corey M, Wilkes DD, Canny GJ, Pedder L, et al. A  
613 randomized controlled trial of a 3-year home exercise program in cystic fibrosis. *The Journal of*  
614 *Pediatrics*. 2000;136(3):304-10.
- 615 7. Nixon PA, Orenstein DM, Kelsey SF, Doershuk CF. The prognostic value of exercise testing  
616 in patients with cystic fibrosis. *New England Journal of Medicine*. 1992;327(25):1785-8.
- 617 8. Wheatley CM, Wilkins BW, Snyder EM. Exercise is medicine in cystic fibrosis. *Exercise and*  
618 *Sport Sciences Reviews*. 2011;39(3):155-60.
- 619 9. Stevens D, Oades PJ, Armstrong N, Williams CA. Exercise metabolism during moderate-  
620 intensity exercise in children with cystic fibrosis following heavy-intensity exercise. *Applied*  
621 *Physiology, Nutrition, and Metabolism*. 2011;36(6):920-7.
- 622 10. Williams CA, Stevens D. Physical activity and exercise training in young people with cystic  
623 fibrosis: Current recommendations and evidence. *Journal of Sport and Health Science*. 2013;2(1):39-  
624 46.
- 625 11. Angelis A, Kanavos P, Lopez-Bastida J, Linertova R, Nicod E, Serrano-Aguilar P, et al.  
626 Social and economic costs and health-related quality of life in non-institutionalised patients with  
627 cystic fibrosis in the United Kingdom. *BMC Health Services Research*. 2015;15(1):428.
- 628 12. Stevens D, Oades PJ, Armstrong N, Williams CA. A survey of exercise testing and training in  
629 UK cystic fibrosis clinics. *Journal of Cystic Fibrosis*. 2010;9(5):302-6.
- 630 13. Goodson HV, Gregoretti IV. Using Computational Modeling to Understand Microtubule  
631 Dynamics. *Methods in Cell Biology*. 2010;95:175-88.
- 632 14. Hardman JG, Ross JJ. Modelling: a core technique in anaesthesia and critical care research.  
633 *British Journal of Anaesthesia*. 2006;97(5):589-92.
- 634 15. Holford N, Ma SC, Ploeger BA. Clinical trial simulation: a review. *Clinical Pharmacology*  
635 *and Therapeutics*. 2010;88(2):166-82.



- 636 16. Kapellos GE, Alexiou TS, Payatakes AC. Theoretical modeling of fluid flow in cellular  
637 biological media: an overview. *Mathematical Biosciences*. 2010;225(2):83-93.
- 638 17. Seethala RR, Esposito EC, Abella BS. Approaches to improving cardiac arrest resuscitation  
639 performance. *Current Opinion in Critical Care*. 2010;16(3):196-202.
- 640 18. McCahon RA, Columb MO, Mahajan RP, Hardman JG. Validation and application of a high-  
641 fidelity, computational model of acute respiratory distress syndrome to the examination of the indices  
642 of oxygenation at constant lung-state. *British Journal of Anaesthesia*. 2008;101(3):358-65.
- 643 19. Mintun MA, Lundstrom BN, Snyder AZ, Vlassenko AG, Shulman GL, Raichle ME. Blood  
644 flow and oxygen delivery to human brain during functional activity: Theoretical modeling and  
645 experimental data. *Proceedings of the National Academy of Sciences of the United States of*  
646 *America*. 2001;98(12):6859-64.
- 647 20. Noble D. Modeling the heart--from genes to cells to the whole organ. *Science*.  
648 2002;295(5560):1678-82.
- 649 21. Moppett IK, Hardman JG. Development and Validation of an Integrated Computational  
650 Model of Cerebral Blood Flow and Oxygenation. *Anesthesia & Analgesia*. 2007;105(4):1094-103.
- 651 22. Murkin JM, Arango M. Near-infrared spectroscopy as an index of brain and tissue  
652 oxygenation. *British Journal of Anaesthesia*. 2009;103(Supplement 1):i3-i13.
- 653 23. Hermans MP, Brotons C, Elisaf M, Michel G, Muls E, Nobels F. Optimal type 2 diabetes  
654 mellitus management: the randomised controlled OPTIMISE benchmarking study: baseline results  
655 from six European countries. *European Journal of Preventive Cardiology*. 2013;20(6):1095-105.
- 656 24. Saynor ZL, Barker AR, Oades PJ, Williams CA. A protocol to determine valid VO<sub>2</sub>max in  
657 young cystic fibrosis patients. *Journal of Science and Medicine in Sport*. 2013;16(6):539-44.
- 658 25. Saynor ZL, Barker AR, Oades PJ, Williams CA. Reproducibility of maximal  
659 cardiopulmonary exercise testing for young cystic fibrosis patients. *Journal of Cystic Fibrosis*.  
660 2013;12(6):644-50.
- 661 26. Hulzebos HJ, Werkman MS, van Brussel M, Takken T. Towards an individualized protocol  
662 for workload increments in cardiopulmonary exercise testing in children and adolescents with cystic  
663 fibrosis. *Journal of Cystic Fibrosis*. 2012;11(6):550-4.

- 664 27. Barker AR, Williams CA, Jones AM, Armstrong N. Establishing maximal oxygen uptake in  
665 young people during a ramp cycle test to exhaustion. *British Journal of Sports Medicine*.  
666 2011;45(6):498-503.
- 667 28. Sacks J, Welch WJ, Mitchell TJ, Wynn HP. Design and analysis of computer experiments.  
668 *Statistical Science*. 1989:409-23.
- 669 29. Kleijnen JP. Kriging metamodeling in simulation: A review. *European Journal of Operational*  
670 *Research*. 2009;192(3):707-16.
- 671 30. Jin R, Chen W, Simpson TW. Comparative studies of metamodeling techniques under  
672 multiple modelling criteria. *Structural and Multidisciplinary Optimization*. 2001;23(1):1-13.
- 673 31. Forrester AI, Keane AJ. Recent advances in surrogate-based optimization. *Progress in*  
674 *Aerospace Sciences*. 2009;45(1):50-79.
- 675 32. Chen VC, Tsui K-L, Barton RR, Meckesheimer M. A review on design, modeling and  
676 applications of computer experiments. *IIE Transactions*. 2006;38(4):273-91.
- 677 33. Schwaighofer A, Grigoras M, Tresp V, Hoffmann C, editors. GPPS: A Gaussian process  
678 positioning system for cellular networks. *Advances in Neural Information Processing Systems*; 2004.
- 679 34. Bailer-Jones CAL, Sabin TJ, MacKay DJC, Withers PJ, editors. Prediction of deformed and  
680 annealed microstructures using Bayesian neural networks and Gaussian processes. *Proceedings of the*  
681 *Australasia Pacific Forum on Intelligent Processing and Manufacturing of Materials*; 1997.
- 682 35. Kalaitzis AA, Lawrence ND. A simple approach to ranking differentially expressed gene  
683 expression time courses through Gaussian process regression. *BMC Bioinformatics*. 2011;12(1):180.
- 684 36. Lawrence ND, Sanguinetti G, Rattray M. Modelling transcriptional regulation using Gaussian  
685 processes. *Advances in Neural Information Processing Systems*. 2007;19:785.
- 686 37. Swain PS, Stevenson K, Leary A, Montano-Gutierrez LF, Clark IB, Vogel J, et al. Inferring  
687 time derivatives including cell growth rates using Gaussian processes. *Nature Communications*.  
688 2016;7.
- 689 38. Taylor-Robinson D, Whitehead M, Diderichsen F, Olesen HV, Pressler T, Smyth RL, et al.  
690 Understanding the natural progression in% FEV1 decline in patients with cystic fibrosis: a  
691 longitudinal study. *Thorax*. 2012;67(10):860-6.

- 692 39. Vilozni D, Bentur L, Efrati O, Minuskin T, Barak A, Szeinberg A, et al. Spirometry in early  
693 childhood in cystic fibrosis patients. *Chest*. 2007;131(2):356-61.
- 694 40. Kerem E, Reisman J, Corey M, Canny GJ, Levison H. Prediction of mortality in patients with  
695 cystic fibrosis. *New England Journal of Medicine*. 1992;326(18):1187-91.
- 696 41. Beaver WL, Wasserman K, Whipp BJ. A new method for detecting anaerobic threshold by  
697 gas exchange. *Journal of Applied Physiology*. 1986;60(6):2020-7.
- 698 42. Rasmussen C, Williams C. Gaussian processes for machine learning (Adaptive computation  
699 and machine learning series) Cambridge, MA: The MIT Press; 2005.
- 700 43. Thin AG, Linnane SJ, McKone EF, Freaney R, FitzGerald MX, Gallagher CG, et al. Use of  
701 the gas exchange threshold to noninvasively determine the lactate threshold in patients with cystic  
702 fibrosis. *Chest*. 2002;121(6):1761-70.
- 703 44. Thin AG, Dodd JD, Gallagher CG, Fitzgerald MX, McLoughlin P. Effect of respiratory rate  
704 on airway deadspace ventilation during exercise in cystic fibrosis. *Respiratory Medicine*.  
705 2004;98(11):1063-70.
- 706 45. Jones DR, Schonlau M, Welch WJ. Efficient global optimization of expensive black-box  
707 functions. *Journal of Global Optimization*. 1998;13(4):455-92.
- 708 46. Cooper PJ, Robertson CF, Hudson IL, Phelan PD. Variability of pulmonary function tests in  
709 cystic fibrosis. *Pediatric Pulmonology*. 1990;8(1):16-22.
- 710 47. Balfour-Lynn IM. Personalised medicine in cystic fibrosis is unaffordable. *Paediatric*  
711 *Respiratory Reviews*. 2014;15 Suppl 1:2-5.
- 712 48. Titsias MK, editor *Variational Learning of Inducing Variables in Sparse Gaussian Processes*.  
713 *AISTATS*; 2009.
- 714 49. Mazzoleni MJ, Battaglini CL, Martin KJ, Coffman EM, Mann BP. Modeling and predicting  
715 heart rate dynamics across a broad range of transient exercise intensities during cycling. *Sports*  
716 *Engineering*. 2016;19(2):117-27.
- 717 50. Stirling JR, Zakyntinaki M, Refoyo I, Sampedro J. A Model of Heart Rate Kinetics in  
718 Response to Exercise. *Journal of Nonlinear Mathematical Physics*. 2008;15(sup3):426--36.
- 719 51. Ursino M. Interaction between carotid baroregulation and the pulsating heart: a mathematical  
720 model. *American Journal of Physiology Heart and Circulatory Physiology*. 1998;275(5):H1733-H47.

- 721 52. Zakythinaki MS. Modelling heart rate kinetics. PLoS ONE. 2015;10(4):1--26.
- 722 53. Gutierrez G. A mathematical model of tissue–blood carbon dioxide exchange during hypoxia.  
723 American Journal of Respiratory and Critical Care Medicine. 2004;169(4):525-33.
- 724 54. Bates JHT. Lung mechanics: an inverse modeling approach. Cambridge: Cambridge  
725 University Press; 2009.
- 726 55. Reynolds A, Ermentrout GB, Clermont G. A mathematical model of pulmonary gas exchange  
727 under inflammatory stress. Journal of Theoretical Biology. 2010;264(2):161-73.
- 728 56. Crooke P, Hotchkiss J, Marini J. Linear and nonlinear mathematical models for noninvasive  
729 ventilation. Mathematical and Computer Modelling. 2002;35(11-12):1297-313.
- 730 57. Kek K, Miyakawa T, Yoneyama S, Kudo N, Yamamoto K, editors. Simulation of exercise-  
731 dependent difference in metabolism with a mathematical model for analyses of measurements using  
732 near-infrared spectroscopy. Engineering in Medicine and Biology Society, 2006 EMBS'06 28th  
733 Annual International Conference of the IEEE; 2006: IEEE.
- 734 58. Krauss M, Schaller S, Borchers S, Findeisen R, Lippert J, Kuepfer L. Integrating cellular  
735 metabolism into a multiscale whole-body model. PLoS Computational Biology.  
736 2012;8(10):e1002750.
- 737 59. Li Y, Lai N, Kirwan JP, Saidel GM. Computational model of cellular metabolic dynamics in  
738 skeletal muscle fibers during moderate intensity exercise. Cellular and Molecular Bioengineering.  
739 2012;5(1):92-112.
- 740 60. Lai N, Camesasca M, Saidel GM, Dash RK, Cabrera ME. Linking pulmonary oxygen uptake,  
741 muscle oxygen utilization and cellular metabolism during exercise. Annals of Biomedical  
742 Engineering. 2007;35(6):956-69.
- 743 61. Cloutier M, Wellstead P. The control systems structures of energy metabolism. Journal of The  
744 Royal Society Interface. 2009:rsif20090371.
- 745 62. Dash RK, Dibella Ja, Cabrera ME. A computational model of skeletal muscle metabolism  
746 linking cellular adaptations induced by altered loading states to metabolic responses during exercise.  
747 Biomedical Engineering Online. 2007;6:14.
- 748 63. Kim J, Saidel GM, Cabrera ME. Multi-scale computational model of fuel homeostasis during  
749 exercise: effect of hormonal control. Annals of Biomedical Engineering. 2007;35(1):69-90.

- 750 64. Fresiello L, Meyns B, Di Molfetta A, Ferrari G. A Model of the Cardiorespiratory Response  
751 to Aerobic Exercise in Healthy and Heart Failure Conditions. *Frontiers in Physiology*. 2016;7.
- 752 65. Fresiello L, Ferrari G, Di Molfetta A, Zieliński K, Tzallas A, Jacobs S, et al. A cardiovascular  
753 simulator tailored for training and clinical uses. *Journal of Biomedical Informatics*. 2015;57:100-12.
- 754 66. Timischl S. *A Global Model for the Cardiovascular and Respiratory System*: University of  
755 Graz; 1998.
- 756 67. D'Angelo C. *Multiscale modelling of metabolism and transport phenomena in living tissues*:  
757 École Polytechnique Fédérale de Lausanne; 2007.
- 758 68. Hardman J, Bedford N, Ahmed A, Mahajan R, Aitkenhead A. A physiology simulator:  
759 validation of its respiratory components and its ability to predict the patient's response to changes in  
760 mechanical ventilation. *British Journal of Anaesthesia*. 1998;81(3):327-32.
- 761 69. Lai N, Saidel GM, Grassi B, Gladden LB, Cabrera ME. Model of oxygen transport and  
762 metabolism predicts effect of hyperoxia on canine muscle oxygen uptake dynamics. *Journal of*  
763 *Applied Physiology*. 2007;103(4):1366-78.
- 764 70. Benson AP, Grassi B, Rossiter HB. A validated model of oxygen uptake and circulatory  
765 dynamic interactions at exercise onset in humans. *Journal of Applied Physiology*. 2013;115(5):743-  
766 55.
- 767 71. Bell C, Paterson DH, Kowalchuk JM, Padilla J, Cunningham DA. A Comparison of  
768 Modelling Techniques used to Characterise Oxygen Uptake Kinetics During the on-Transient of  
769 Exercise. *Experimental Physiology*. 2001;86(5):667-76.
- 770 72. Elstad M, Toska K, Walløe L. Model simulations of cardiovascular changes at the onset of  
771 moderate exercise in humans. *The Journal of Physiology*. 2002;543(2):719-28.
- 772 73. Ng LJ, Sih BL, Stuhmiller JH. An integrated exercise response and muscle fatigue model for  
773 performance decrement estimates of workloads in oxygen-limiting environments. *European Journal*  
774 *of Applied Physiology*. 2012;112(4):1229-49.
- 775 74. Walter G, Vandenborne K, Elliott M, Leigh JS. In vivo ATP synthesis rates in single human  
776 muscles during high intensity exercise. *The Journal of Physiology*. 1999;519(3):901-10.

- 777 75. Eriksson A, Holmberg H-C, Westerblad H. A numerical model for fatigue effects in whole-  
778 body human exercise. *Mathematical and Computer Modelling of Dynamical Systems*. 2016;22(1):21-  
779 38.
- 780 76. Liu JZ, Brown RW, Yue GH. A dynamical model of muscle activation, fatigue, and recovery.  
781 *Biophysical Journal*. 2002;82(5):2344-59.
- 782 77. Dash RK, Li Y, Kim J, Saidel GM, Cabrera ME. Modeling cellular metabolism and  
783 energetics in skeletal muscle: large-scale parameter estimation and sensitivity analysis. *IEEE*  
784 *Transactions on Biomedical Engineering*. 2008;55(4):1298-318.
- 785 78. Moxnes JF, Sandbakk Ø. The kinetics of lactate production and removal during whole-body  
786 exercise. *Theoretical Biology and Medical Modelling*. 2012;9(1):7.
- 787 79. Péronnet F, Aguilaniu B. Lactic acid buffering, nonmetabolic CO<sub>2</sub> and exercise  
788 hyperventilation: a critical reappraisal. *Respiratory Physiology & Neurobiology*. 2006;150(1):4-18.
- 789 80. Batzel JJ, Kappel F, Timischl-Teschl S. A cardiovascular-respiratory control system model  
790 including state delay with application to congestive heart failure in humans. *Journal of Mathematical*  
791 *Biology*. 2005;50(3):293-335.
- 792 81. Hebestreit H, Arets HG, Aurora P, Boas S, Cerny F, Hulzebos EH, et al. Statement on  
793 Exercise Testing in Cystic Fibrosis. *Respiration*. 2015;90(4):332-51.
- 794 82. Weir E, Burns PD, Devenny A, Young D, Paton JY. Cardiopulmonary exercise testing in  
795 children with cystic fibrosis: one centre's experience. *Archives of disease in childhood*.  
796 2017;102(5):440-4.
- 797 83. Liou TG, Adler FR, Fitzsimmons SC, Cahill BC, Hibbs JR, Marshall BC. Predictive 5-Year  
798 Survivorship Model of Cystic Fibrosis. *American Journal of Epidemiology*. 2001;153(4):345-52.
- 799 84. Aaron SD, Stephenson AL, Cameron DW, Whitmore GA. A statistical model to predict one-  
800 year risk of death in patients with cystic fibrosis. *Journal of Clinical Epidemiology*.  
801 2015;68(11):1336-45.
- 802 85. Middleton PG, Matson AG, Robinson PD, Jane Holmes-Walker D, Katz T, Hameed S. Cystic  
803 Fibrosis Related Diabetes: Potential pitfalls in the transition from paediatric to adult care. *Paediatric*  
804 *Respiratory Reviews*. 2014;15(3):281-4.

805 86. Hayes D, Jr., Tobias JD, Mansour HM, Kirkby S, McCoy KS, Daniels CJ, et al. Pulmonary  
806 hypertension in cystic fibrosis with advanced lung disease. American Journal of Respiratory and  
807 Critical Care Medicine. 2014;190(8):898-905.  
808  
809

841 **Figure Titles**

842 **Figure 9:** (a) The work rate for each participant is increased at a rate dependent on their past  
843 test performance. (b) Participant age is correlated with test performance for young  
844 participants, but not for older ones.

845  
846 **Figure 10:** Ratio of oxygen utilisation and total breathing throughout the test. Markers indicate  
847 the volitional exhaustion times for each participant.

848  
849 **Figure 11:** (a) Correlation of FEV<sub>1</sub> with the maximal tidal volume achieved throughout the test.  
850 (b) Correlation between FEV<sub>1</sub> and FVC is high. Note that, although FVC and FEV<sub>1</sub> are good  
851 predictors of poor test performance, they are unable to distinguish better performing  
852 participants.

853  
854 **Figure 12:** (a) Total ventilation plotted against oxygen utilisation. We observe that breathing  
855 pattern is strongly correlated with test performance. (b) Exponential curves are fitted through  
856 the raw data, further highlighting this dependence.

857  
858 **Figure 13:** Slope of the fitted curves ( $\log \dot{V}E$  against  $\dot{V}O_2$ ) from Fig. 4(b) plotted against the  
859 total energy transfer during the test. We find a relatively poor characterisation of the variance  
860 between performances. (b) By instead plotting the oxygen consumption at a fixed rate of  
861 breathing, we better capture differences in performance.

862  
863 **Figure 14:** (a) Breathing patterns subdivided into the breathing rate and tidal volume. These  
864 data appear uninformative for predicting test performance. (b) With the additional inclusion of  
865 the oxygen consumption at a fixed rate of breathing, we find that these variables now almost  
866 perfectly capture variation in participant performance.

867  
868 **Figure 15:** First of the principal components obtained via PCA accounts for over 90% of the  
869 variation in test performance. (b) Similar levels of variance are accounted for by taking only  
870 the normal component of the first principal component in the breathing frequency direction.

871



879 **Figure 16: (a) Quantifying the relationship between the anaerobic threshold and overall test**  
880 **performance. Anaerobic thresholds were calculated using an automated procedure based on**  
881 **previous methods (41) (b)  $\dot{V}O_{2\max}$  is the best single predictor of overall test performance.**

882  
883 **Figure 9: GP is a probability distribution on function spaces. The thick solid red line is the true**  
884 **function  $f$  and the thick dashed black line is the GP mean. (a) Thin grey lines show sample**  
885 **paths of a prior GP whose mean is zero. (b) Blue bullets indicate five data points sampled from**  
886  **$f$ . The GP mean and covariance are updated using these sample points. The thin grey dashed**  
887 **lines show  $m(x) \pm 2s(x)$ .**

888  
889 **Figure 10: (a) Predictions (asterisks) vs. exact values (bullets). Red bars show the 95%**  
890 **confidence intervals,  $m_i(x_i) \pm 1.96 s_i(x_i)$  around the predicted value, where  $m_i$  and  $s_i$  are GP**  
891 **prediction mean and standard deviation based on all but the  $i$ 'th data point. (b) Relative**  
892 **prediction error expressed as a percentage of the true value  $f(x_i)$ .**

893  
894 **Figure 11: Schematic of the variables and processes in the proposed ODE-based mathematical**  
895 **model. Adapted from Timischl (1998) (66) and Batzel *et al.* (2005) (80).**

896

De
